# Supplementary material
Source: publisher site journal article supplement (https://static.cambridge.org/content/id/urn:cambridge.org:id:article:S0016756818000869/resource/name/S0016756818000869supp003.xls)
Supplement: Supplementary file 1 [file S0016756818000869supp003.xls]

## Sheet: 14BB44-1
Supplementary Table 2 LA-ICP-MS trace-element compositions of zircons from the granitoids in the Bengbu area.
Elements	14BB44-1-17	14BB44-1-01	14BB44-1-10	14BB44-1-19	14BB44-1-03	14BB44-1-06	14BB44-1-08	14BB44-1-11	14BB44-1-15	14BB44-1-21	14BB44-1-22	14BB44-1-24	14BB44-1-28	14BB44-1-29
Ti	5.22781	15.4473	10.2363	16.1991	4.01198	6.67788	3.83025	5.63105	6.73851	4.55544	3.09908	5.63252	3.6062	4.14959
Rb	0.188951	9.4921	1.24498	0.634119	0.167259	0.365429	0.222922	0.409658	0.326679	0.288497	0.16292	0.16723	0.14121	0.18064
Sr	0.24246	3.55665	3.1589	1.40429	0.364885	1.40597	0.606495	6.53385	1.749	0.626119	0.922162	1.14086	0.880335	0.454677
Y	967.522	1736.04	1265.48	1222.59	897.336	1738.5	1245.27	1582.67	1266.24	1284.88	923.402	926.532	716.378	966.939
Nb	2.76939	4.22276	3.7959	2.7716	1.94927	3.96534	2.34352	7.19405	3.67324	3.19385	1.96247	2.88964	2.61723	1.59869
La	0.00575448	2.49601	1.09781	0.631814	0.00636957	0.474226	0.193771	1.45754	0.840992	0.126644	0.119366	0.218136	0.152357	0.0119113
Ce	9.03324	24.9592	25.8409	12.0599	5.64391	19.3582	8.90116	32.0671	21.5463	12.9792	20.4862	12.7826	10.1894	6.17946
Pr	0.0783376	1.1454	1.3435	0.355839	0.0920978	0.508708	0.293639	1.52171	0.809602	0.236324	0.333197	0.343026	0.165785	0.131213
Nd	1.37195	9.42078	9.08421	3.65239	1.96803	4.02726	3.65679	10.39	6.18012	2.92381	3.42252	3.30051	1.7739	2.05106
Sm	3.04879	10.8769	10.5622	5.62998	3.82216	6.85455	6.20594	10.2603	8.39391	5.56479	5.70736	4.85665	2.79482	4.17122
Eu	0.92821	2.83845	4.03915	1.35491	1.03295	1.81666	1.77089	3.76864	2.89753	1.363	1.94977	1.69938	0.948452	1.41512
Gd	17.9908	47.9899	36.1371	28.272	21.0974	34.8635	32.6616	39.6312	30.9889	30.0249	21.6296	22.1541	14.7683	23.3499
Tb	6.23184	15.6141	12.5456	9.34223	6.78026	12.6361	10.339	13.3357	10.8482	9.80367	7.13928	7.80061	5.30088	7.56104
Dy	78.5367	173.968	132.941	110.565	80.8849	146.313	119.405	150.368	120.183	116.075	79.8032	87.6282	64.285	90.1578
Ho	32.0815	60.3443	43.6393	41.6891	30.5385	57.9838	43.4114	53.4743	42.0284	43.3556	29.3208	31.1394	24.0506	32.6701
Er	149.424	258.763	182.955	182.249	133.743	265.216	186.046	235.766	187.531	191.317	134.833	139.567	111.219	143.243
Tm	31.3881	51.6691	37.0064	36.1233	26.6009	53.9126	36.0337	48.6896	39.1168	38.1391	29.7411	28.3342	22.8532	28.2674
Yb	294.349	461.857	332.262	321.281	236.532	503.123	319.541	434.224	368.152	343.062	294.674	262.88	212.766	256.244
Lu	62.6661	91.027	64.2741	65.3486	48.116	102.178	63.5932	85.7324	73.9365	69.5823	65.4276	53.4305	43.3668	51.4322
Hf	7320.93	7444.42	8265.92	7669.54	7183.22	8403.3	7534.31	9241.59	8545.18	7935.86	8400.86	7657.06	8234.63	7137.53
Ta	0.751721	1.06167	1.04861	0.774573	0.510135	1.05165	0.619213	2.02316	1.07517	0.899479	0.549968	0.797098	0.844449	0.437681
Th	36.1105	145.427	145.983	78.37	28.6549	89.9901	57.2669	199.588	83.8227	85.7947	107.688	62.201	39.8056	25.0713
U	66.2224	185.638	167.484	110.07	51.4823	163.547	78.1684	257.991	126.155	125.724	160.082	114.591	91.5523	46.818
U/Yb	0.224979	0.401938	0.504073	0.342597	0.217654	0.325064	0.244627	0.594144	0.34267	0.366477	0.543252	0.435906	0.430295	0.182709
Th/U	0.545292	0.783392	0.871625	0.712001	0.556599	0.55024	0.73261	0.773624	0.664444	0.682404	0.672706	0.542809	0.434785	0.535507
Y/Gd	53.7788	36.1751	35.0189	43.2439	42.5329	49.8659	38.1264	39.935	40.8609	42.7937	42.6915	41.8222	48.5079	41.4108
Yb/Gd	16.3611	9.62404	9.19448	11.3639	11.2114	14.4312	9.78337	10.9566	11.8801	11.4259	13.6236	11.866	14.407	10.9741
Tempereture (Ti)	688.408	788.443	748.091	793.309	666.768	709.326	663.079	694.662	710.116	677.03	646.581	694.684	658.325	669.471
Eu#	0.38321	0.379868	0.632143	0.328366	0.351715	0.359318	0.380321	0.571434	0.549317	0.322411	0.536563	0.500927	0.451392	0.438428
Ce#	102.401	3.55286	5.12124	6.1217	56.0854	9.48607	8.98142	5.18242	6.28479	18.0572	24.7241	11.2472	15.4311	37.6211
Gd/YbN	0.0493213	0.0838473	0.0877646	0.0710097	0.0719757	0.0559169	0.0824818	0.0736496	0.0679244	0.0706246	0.0592317	0.0680053	0.0560111	0.0735323

## Sheet: 14BB35-1
Elements	14BB35-1-18	14BB35-1-21	14BB35-1-42	14BB35-1-47	14BB35-1-48	14BB35-1-57
Ti	3.42708	3.47494	4.88113	5.59867	4.4588	2.9768
Rb	0.110586	0.285602	0.0851003	0.0819566	0.143268	0.129664
Sr	0.212897	0.23815	0.202527	0.19342	0.280326	0.214064
Y	289.892	1202.64	442.825	276.636	878.919	345.027
Nb	0.314315	0.788563	0.497442	0.316536	1.68077	0.69527
La	0.021423	0.00328565	0.00833333	0.0354016	0.0397161	0.0603009
Ce	3.62998	13.1704	3.38324	4.56351	13.6411	6.20574
Pr	0.0203266	0.0321763	0.0199781	0.0129515	0.0305172	0.0474382
Nd	0.348333	0.936458	0.504938	0.482579	0.520613	0.461553
Sm	0.956274	3.58853	1.33199	1.0674	1.97722	1.64504
Eu	0.0510519	2.48321	0.165394	0.0814124	0.593325	0.189873
Gd	6.76375	32.1279	8.82721	6.3057	17.7976	8.56598
Tb	2.19434	10.3064	3.09884	2.08383	6.2973	2.81076
Dy	26.0144	112.752	37.3033	24.6887	77.0473	31.405
Ho	9.41921	41.3749	14.213	9.12144	28.7099	11.5778
Er	41.8048	174.976	64.4132	40.9363	128.771	50.509
Tm	8.81305	35.3251	14.2431	8.64538	26.3118	10.6045
Yb	82.5685	310.574	134.648	80.0531	235.965	96.4437
Lu	17.6413	63.2553	28.5872	16.8512	46.3958	20.4014
Hf	9478.61	7577.85	9730.75	10367.9	11077.8	10249
Ta	0.194427	0.253962	0.477327	0.185275	0.644866	0.380226
Th	14.7457	54.559	20.8016	13.7526	73.9235	39.6304
U	44.9836	160.989	98.1303	53.0483	250.943	102.344
U/Yb	0.544803	0.518357	0.728791	0.662664	1.06348	1.06117
Th/U	0.327801	0.3389	0.211979	0.259247	0.294583	0.387229
Y/Gd	42.8597	37.4328	50.1659	43.8708	49.3841	40.2788
Yb/Gd	12.2075	9.66683	15.2538	12.6954	13.2582	11.2589
Tempereture (Ti)	654.344	655.424	682.703	694.174	675.283	643.511
Eu#	0.0613771	0.70712	0.147482	0.0959491	0.305819	0.154656
Ce#	41.8679	308.297	63.1097	51.2953	94.3066	27.9265
Gd/YbN	0.0661028	0.0834762	0.0529017	0.0635625	0.0608641	0.071672

## Sheet: 14BB41-1 14BB47-1 14BB49-1
Elements	14BB41-1-22	14BB41-1-24	14BB49-1-17	14BB49-1-31	14BB41-1-26	14BB49-1-37	14BB41-1-20	14BB41-1-01	14BB41-1-03	14BB41-1-07	14BB41-1-11	14BB41-1-23	14BB41-1-30	14BB47-1-01	14BB47-1-05	14BB47-1-07	14BB47-1-09	14BB47-1-13	14BB47-1-14	14BB47-1-15	14BB47-1-17	14BB47-1-18	14BB47-1-21	14BB47-1-22	14BB47-1-27	14BB47-1-28	14BB47-1-30	14BB47-1-31	14BB47-1-33	14BB47-1-35	14BB47-1-37	14BB49-1-02	14BB49-1-03	14BB49-1-09	14BB49-1-13	14BB49-1-16	14BB49-1-22	14BB49-1-24	14BB49-1-26	14BB49-1-27	14BB49-1-29	14BB49-1-32	14BB49-1-38	14BB49-1-41	14BB49-1-47	14BB49-1-48	14BB49-1-56	14BB49-1-57
Ti	5.77512	5.64514	11.9913	9.89896	3.11306	10.4171	13.3005	7.21686	2.91155	6.60698	2.73613	4.19811	8.40952	2.99674	1.85652	3.78082	2.42751	2.92376	2.28879	5.20058	3.32706	4.74364	7.46629	3.53823	0.272873	2.65488	2.8186	3.1672	3.61153	3.60183	4.81565	4.11765	5.56228	4.73883	5.04178	3.47595	4.83557	8.16583	8.41347	5.39882	6.86203	4.80088	4.66008	6.14036	5.19405	5.85121	5.69216	6.45502
Rb	0.860492	0.24373	0.074179	0.20001	0.048468	0.368272	2.8757	0.417241	0.0827107	0.153808	0.226159	0.0929397	0.295826	0.179784	0.11553	0.0321529	0.138048	0.119935	0.00689079	1.35307	0.0699632	0.178052	0.113239	0.0628919	0.0301528	0.0436329	0.0887784	0.0974959	0.0223968	0.245759	0.191649	0.0777177	0.121223	0.0436928	0.153499	0.00435439	0.0555072	0.115423	0.343604	0.0562359	0.111447	0.0259483	0.0499272	0.115618	0	0.139954	0.0985326	0.132203
Sr	3.15684	0.708745	1.0934	7.94197	0.174836	0.218912	1.08496	0.342747	0.190664	0.228675	0.258211	1.75288	1.2249	0.987552	0.184708	0.167594	0.809869	1.52257	0.3411	0.182756	0.151148	1.06522	1.63938	0.550139	1.07347	0.159276	0.35823	0.145436	0.580032	1.27983	0.176161	0.233073	0.202361	0.168706	0.216813	0.24895	0.157321	3.56866	0.912962	0.194578	0.581702	0.0937979	0.185726	0.230501	0.105092	0.150589	0.751855	1.85918
Y	1264.38	1120.88	330.309	698.623	171.576	931.476	962.735	474.028	337.504	902.846	679.576	468.977	789.65	399.177	287.708	409.106	386.778	455.997	401.158	281.398	243.363	633.608	301.021	473.141	594.56	461.375	534.761	268.438	420.775	439.788	341.93	403.061	516.097	253.833	380.833	420.362	720.669	372.44	891.564	798.727	499.801	339.745	369.773	1099.29	197.458	694.588	818.753	488.585
Nb	2.40613	2.69622	1.20886	1.74842	2.05674	0.840315	2.26319	2.15279	2.13561	4.21234	2.39124	2.1169	2.38495	1.23323	0.951135	1.26503	0.959683	1.69572	1.1364	0.932747	0.734597	1.88626	0.939842	1.82611	0.783648	0.680353	0.806924	0.780873	1.04475	0.789589	1.06252	0.438238	0.489279	0.357154	0.417386	0.609372	1.45667	0.514915	1.31326	0.577445	0.490346	0.375286	0.480409	2.84743	0.25953	0.374994	0.848497	0.560142
La	0.543181	0.359976	0.387848	0.108243	0.00125614	0.00833333	0.209947	0.0891112	0.00312128	0.0104504	0.0331653	0.124789	0.635545	0.00862491	0.0213381	0.00833333	0.00364032	0.00833333	0.0502148	0.00499999	0.00330711	0.1652	1.26333	0.0133184	0.667596	0.278762	0.00486528	0.387567	0.611324	0.00235078	0.00500334	0.00833333	0.00833333	0.00513051	0.0231758	0.0602818	0.0310308	0.0376568	0.0458575	0.00506418	0.0530358	0.0716661	0.00866279	0.0723767	0.0425162	0.00518384	0.131607	0.0277031
Ce	19.1535	47.1274	8.80963	17.0873	7.39129	9.84401	19.0217	3.89233	16.9251	20.9545	26.1409	14.3979	17.7956	16.3353	9.33462	19.0515	18.1051	19.1274	13.7322	20.3109	21.1445	20.5802	18.4909	18.6775	25.3672	18.4254	15.9402	17.3318	12.7412	12.4744	18.7981	1.88101	2.23641	1.84677	1.96044	7.53122	13.126	2.12528	17.1365	4.36801	2.4921	4.91985	1.7927	37.6861	1.79632	6.76626	11.9977	6.02539
Pr	0.896942	0.648411	0.168915	0.11368	0.0160814	0.0368204	0.472987	0.0769252	0.0283825	0.134109	0.106766	0.235277	0.758651	0.00833333	0.0318096	0.0481296	0.0689837	0.00833333	0.0128796	0.0514463	0.047281	0.155375	0.587278	0.039608	0.583938	0.251327	0.108389	0.103192	0.188041	0.0744057	0.041166	0.0237972	0.0108542	0.013139	0.0521051	0.0920526	0.206776	0.040721	0.0519936	0.0490148	0.0239771	0.128221	0.045017	0.177833	0.0169164	0.0714421	0.169586	0.0587162
Nd	7.93442	6.78073	1.40163	1.92453	0.331522	0.969326	6.23588	0.831727	0.652998	2.5906	1.30964	2.08161	6.49985	0.844832	0.750932	0.796994	1.16299	0.93487	0.72221	0.729939	0.809257	2.15772	3.89802	0.525	4.72864	2.84956	2.41425	0.990752	1.74902	1.52014	0.754417	0.3018	0.440112	0.237978	0.592157	1.42378	3.20519	0.316394	1.38578	1.07387	0.659888	1.84546	0.438942	3.18897	0.57715	1.57244	1.91648	0.627018
Sm	9.65272	7.6853	1.71834	4.60169	0.611126	3.1565	8.18505	1.44848	1.39967	5.16308	2.49544	2.75379	6.25811	1.50156	1.23784	1.62284	1.96894	1.72839	1.28531	1.35182	1.17295	3.40975	1.62468	2.0396	4.90896	3.98431	3.71802	1.34346	2.22628	2.85392	1.39187	1.80122	2.36674	0.983368	1.49506	3.26423	5.83193	1.33675	4.54186	3.29807	1.88745	2.55844	1.14608	7.89076	1.16246	4.15351	4.69425	2.01086
Eu	5.02012	3.37639	1.01481	1.51429	0.156422	0.91577	2.90547	0.412923	0.272525	0.394948	1.00227	1.91884	3.00189	0.565475	0.317847	0.46955	0.793054	0.579869	0.397408	0.575647	0.367382	0.796047	0.568025	0.486404	1.41181	1.15305	0.939716	0.540334	0.60347	0.629631	0.414164	0.0846673	0.0878888	0.0278006	0.0791966	0.976469	2.84702	0.0636817	1.73026	1.85286	0.130442	0.992427	0.0636714	3.34437	0.558069	3.10635	2.07231	0.793278
Gd	41.2475	31.0673	11.7116	24.9938	3.05318	25.431	31.3272	8.92548	6.88572	25.4774	12.4787	10.7631	22.7852	8.69875	6.38356	8.53119	9.19847	9.668	8.23127	6.58498	6.44925	15.6334	6.35489	10.1433	17.9202	13.1966	14.1041	6.61406	9.7458	11.9313	7.07435	9.77443	13.2802	6.80134	10.1146	13.8554	23.8977	9.4828	29.1989	21.9878	12.599	12.826	9.14699	46.1416	5.77837	27.3611	28.5111	12.018
Tb	11.797	8.54699	3.74559	7.19872	1.10131	8.23008	8.42774	3.08968	2.16695	7.72785	3.92957	3.33145	6.43853	2.75673	2.21298	2.75935	2.70514	3.23615	2.73017	2.05664	1.93845	4.51743	1.99412	3.38586	4.9101	3.6941	4.13426	1.85707	3.24794	3.38508	2.33109	3.26268	4.6216	2.11107	3.21964	3.77095	6.46191	3.0769	8.80618	6.80436	4.14257	3.17646	3.03502	12.7742	1.62615	7.21788	8.12321	3.91978
Dy	121.363	93.4136	32.0896	72.6011	12.7047	86.8921	86.4022	38.1936	25.2345	84.0836	48.9591	36.3141	69.1088	32.9223	24.6462	33.5033	31.714	37.1019	33.4944	23.0649	20.6511	53.4584	23.5388	39.9493	53.919	40.4733	45.3143	21.7738	35.1441	37.2212	27.2246	37.663	48.5985	23.0077	36.0713	40.1312	65.6147	33.8539	91.1111	73.083	45.7047	33.9999	32.6883	118.978	17.1052	69.4586	81.0004	43.6137
Ho	40.7659	34.254	11.8234	22.4777	4.99711	29.9458	30.408	14.984	10.2016	29.4087	20.4659	13.7224	24.1376	12.6734	9.62977	13.0929	12.2148	14.6748	13.3139	8.82984	7.71331	20.1516	9.10316	15.397	19.4108	14.86	17.361	8.44366	13.8121	13.9336	10.7854	13.089	16.6187	8.03909	12.1325	13.256	23.0738	12.4724	29.445	27.0291	15.9922	11.0467	11.9924	36.7556	6.16604	23.4841	27.001	14.7827
Er	173.943	162.239	45.7096	87.8329	24.7728	124.464	134.195	72.2108	51.3385	122.754	104.072	70.3362	108.125	62.2691	45.2116	64.2079	59.1577	71.5301	61.1156	44.319	37.0523	94.324	45.2742	72.4461	86.9068	67.7646	81.8515	41.0071	64.4237	65.4667	50.7654	55.8005	67.1658	33.692	51.8123	55.5394	102.905	51.3006	114.963	113.855	68.6255	44.3866	50.0629	137.22	28.021	98.9108	108.569	66.0335
Tm	35.8531	35.6261	8.19648	16.2889	5.60557	24.4656	27.8767	16.0315	11.9119	23.7963	24.2912	17.3223	22.8743	13.6591	9.66571	14.2074	13.5792	15.8858	13.3281	9.99769	8.33072	20.6591	10.4142	15.9914	18.9513	14.8059	18.0747	9.363	14.1343	14.2878	11.6703	11.4122	12.8038	6.5523	10.174	11.3372	20.9982	10.4047	22.2012	22.6693	13.3603	8.34965	10.3957	25.5622	6.06369	19.1439	20.0922	13.7626
Yb	332.781	338.77	76.4638	137.388	57.9316	206.322	259.579	157.954	123.513	202.11	244.74	193.208	219.075	136.124	98.5473	140.308	138.386	155.034	127.816	105.758	84.9127	198.219	104.688	148.392	179.837	149.714	174.881	97.084	135.619	143.196	114.311	99.9355	106.929	58.5005	90.5351	104.879	201.572	94.3351	180.261	202.562	118.314	73.8074	94.4353	210.433	58.9027	173.909	180.157	131.513
Lu	68.1657	72.4562	14.4423	25.3315	12.8302	39.3835	56.3403	34.87	29.1711	39.2127	54.9251	50.1705	47.1478	30.3824	21.4629	31.2044	32.3692	34.3922	28.5308	23.4174	18.9273	43.0519	25.1633	32.2768	39.676	33.4901	38.5714	22.4756	30.6112	31.4659	26.2829	19.4184	20.0349	10.9184	17.6214	21.2845	44.8471	18.0765	33.1091	43.554	22.7277	14.9289	18.1224	37.8674	13.8295	37.4426	34.2397	27.1584
Hf	9262.93	7943.01	7094.63	8845.43	8986.46	11561.6	7701.86	9970.3	9244.23	8795.68	8469.69	9165.69	7770.7	8829.65	9936	8513.38	8171.81	9314.11	8604.54	8419.76	8409.15	7786.46	8054.51	9281.24	8188.59	8322.88	8781.48	8187.72	8286.71	9162.84	8558.25	11466	11435.4	10936.5	11237.6	7969.93	7012.22	12196.3	10577.7	7160.73	11576.5	8903.55	12003.5	8988.94	6846.55	6980.11	9375.98	9419.61
Ta	0.628088	0.548584	0.277426	0.592981	0.86558	0.311215	0.485023	0.488297	0.69917	1.20145	0.535779	0.353944	0.669286	0.534536	0.456439	0.641561	0.458102	0.656781	0.634099	0.473807	0.423634	0.669236	0.454467	0.838088	0.419663	0.366352	0.364511	0.462434	0.442636	0.412687	0.610514	0.135872	0.122836	0.123115	0.136678	0.216912	0.420172	0.187133	0.397458	0.174965	0.181402	0.240626	0.207189	0.651089	0.147534	0.0875334	0.262674	0.196333
Th	190.288	166.914	162.185	214.15	83.2567	79.032	179.869	37.9903	111.76	124.427	92.7022	114.506	122.106	85.7324	57.8521	107.318	75.8266	144.193	106.357	112.731	85.8701	202.965	55.0322	142.026	130.353	84.7105	104.499	68.1939	69.5707	80.1126	95.6784	18.5623	39.6143	16.7686	22.8882	60.5906	146.94	71.3148	154.757	33.6793	35.9064	36.8001	44.2593	353.641	10.2254	45.5189	111.991	53.7958
U	412.697	179.756	316.412	391.444	234.35	377.299	194.923	89.7227	141.655	107.227	144.555	230.115	251.754	142.665	115.33	170.097	103.859	220.35	212.85	137.059	109.207	259.272	87.5977	238.095	143.977	101.902	137.185	104.308	133.561	136.896	152.433	57.4758	104.174	26.621	35.8187	149.765	232.446	62.1429	391.723	84.9353	45.3296	143.814	61.3737	498.866	39.3493	131.655	295.262	195.289
U/Yb	1.24015	0.530614	4.13806	2.84918	4.0453	1.82869	0.750921	0.568032	1.14688	0.530541	0.590647	1.19102	1.14917	1.04805	1.1703	1.21231	0.750506	1.42131	1.66528	1.29597	1.28611	1.30801	0.836754	1.6045	0.800593	0.680647	0.784447	1.07441	0.984826	0.956004	1.3335	0.575129	0.974235	0.455056	0.395634	1.42797	1.15317	0.658747	2.17308	0.419306	0.383132	1.9485	0.649901	2.37067	0.668039	0.757035	1.63892	1.48494
Th/U	0.461083	0.92856	0.512577	0.547076	0.355266	0.209468	0.922766	0.423419	0.788958	1.16041	0.641294	0.497604	0.485022	0.600933	0.501621	0.630922	0.73009	0.654379	0.499681	0.822502	0.786306	0.782826	0.628238	0.59651	0.905374	0.831292	0.761739	0.653773	0.520889	0.585208	0.627675	0.322958	0.38027	0.6299	0.639	0.404571	0.632144	1.14759	0.395068	0.396529	0.792117	0.255888	0.721145	0.708891	0.259861	0.345743	0.379294	0.275468
Y/Gd	30.6535	36.0792	28.2036	27.9518	56.196	36.6275	30.7316	53.1095	49.0151	35.4371	54.4589	43.5729	34.6563	45.889	45.0702	47.9541	42.0481	47.1656	48.7358	42.7334	37.7351	40.5292	47.3684	46.6456	33.1782	34.9616	37.9154	40.5859	43.175	36.86	48.3337	41.2363	38.8621	37.3211	37.6518	30.3392	30.1564	39.2753	30.5342	36.3259	39.67	26.4888	40.4256	23.8242	34.172	25.3859	28.717	40.6544
Yb/Gd	8.06789	10.9044	6.52891	5.4969	18.9742	8.113	8.28607	17.6969	17.9376	7.93288	19.6126	17.9511	9.61478	15.6487	15.4377	16.4464	15.0444	16.0358	15.5281	16.0604	13.1663	12.6792	16.4735	14.6296	10.0355	11.3448	12.3994	14.6784	13.9157	12.0017	16.1585	10.2242	8.05178	8.60133	8.95093	7.56955	8.43479	9.94802	6.17358	9.21246	9.39073	5.75453	10.3242	4.56058	10.1936	6.35607	6.31884	10.943
Tempereture (Ti)	696.807	694.874	763.24	744.939	646.926	749.744	773.405	716.15	641.83	708.395	637.149	670.406	729.877	644.019	608.98	662.05	628.267	642.147	623.963	687.971	652.045	680.348	719.167	656.834	491.935	634.895	639.38	648.248	658.44	658.229	681.588	668.85	693.622	680.264	685.387	655.447	681.929	727.208	729.92	691.107	711.707	681.335	678.889	702.054	687.866	697.922	695.577	706.371
Eu#	0.769255	0.668114	0.691674	0.431732	0.350136	0.312522	0.554785	0.351138	0.26841	0.10529	0.549168	1.07767	0.768647	0.478403	0.345728	0.385851	0.569782	0.433731	0.373577	0.589928	0.408416	0.333373	0.540516	0.326976	0.460247	0.486203	0.396779	0.554236	0.396129	0.329914	0.403562	0.0616974	0.0479331	0.0328684	0.0622706	0.443954	0.737372	0.0546891	0.459401	0.665277	0.0817886	0.52972	0.0601281	0.535906	0.65838	0.890955	0.547702	0.493398
Ce#	6.60454	23.478	8.28405	37.075	395.811	135.259	14.5284	11.3151	432.802	134.72	105.733	20.2241	6.16832	463.756	86.236	228.962	274.984	552.441	129.964	304.801	406.985	30.9175	5.16687	195.727	9.7787	16.7544	167.069	20.8592	9.04476	227.018	315.256	32.149	56.597	54.1377	13.5783	24.3335	39.4397	13.0627	84.4677	66.7291	16.8202	12.3528	21.8494	79.9512	16.1214	84.6243	19.3291	35.9577
Gd/YbN	0.10002	0.0740021	0.123596	0.146801	0.0425288	0.0994637	0.0973863	0.0455983	0.0449866	0.101722	0.0411444	0.0449528	0.0839281	0.0515665	0.0522715	0.0490653	0.0536378	0.0503219	0.051967	0.0502446	0.0612891	0.0636434	0.0489846	0.0551588	0.0804099	0.0711292	0.0650799	0.0549753	0.0579885	0.0672363	0.0499397	0.0789256	0.10022	0.0938169	0.0901527	0.106605	0.0956693	0.0811166	0.13071	0.0875933	0.0859305	0.140229	0.078161	0.17694	0.079162	0.126957	0.127705	0.0737412

## Sheet: 14BB37-1 14BB08-2 14BB40-1
Elements	14BB37-1-51	14BB37-1-05	14BB37-1-06	14BB37-1-09	14BB37-1-11	14BB37-1-12	14BB37-1-13	14BB37-1-16	14BB37-1-20	14BB37-1-22	14BB37-1-26	14BB37-1-28	14BB37-1-29	14BB37-1-37	14BB37-1-38	14BB37-1-41	14BB37-1-44	14BB37-1-46	14BB37-1-47	14BB37-1-48	14BB37-1-49	14BB37-1-52	14BB37-1-53	14BB37-1-54	14BB37-1-56	14BB08-2-08	14BB08-2-12	14BB08-2-24	14BB40-1-23	14BB40-1-24
Ti	7.21526	6.50825	10.102	13.3021	6.71155	12.4519	3.13158	5.82807	8.13729	9.16547	5.95856	10.8659	3.09415	7.15172	3.7209	9.00401	6.95393	13.4296	7.97031	12.7006	9.35158	6.35232	14.7774	12.558	5.81186	3.85978	11.7514	8.18659	6.85687	6.12193
Rb	0.449562	0.131836	0.106434	0.141699	1.90393	0.595141	0.0708924	0.25023	0.0441234	0.242263	0.0902081	0	0.17406	0.282509	0.051622	0.0848404	0.0948735	0.176504	0.158893	0.274557	0.220892	0.0961896	0.371	0.174626	0.257142	0.113254	0.0867036	0.154833	0.192892	0.183318
Sr	0.445218	0.250719	0.669233	0.250357	0.979419	0.351963	0.245207	0.205529	0.192917	0.304214	0.23302	0.226074	0.283205	0.170688	0.12284	0.192182	0.182161	0.257172	0.186569	0.257549	0.529524	0.185494	0.34446	0.168259	0.396077	0.249671	0.225885	0.30063	1.82092	0.220422
Y	1837.48	735.97	469.251	879.564	530.974	1448.24	487.141	931.965	468.15	1486.98	473.979	584.736	623.962	436.833	222.234	681.369	762.48	967.668	494.224	747.973	831.734	613.556	619.064	682.545	963.968	492.195	549.544	1087.34	828.483	833.427
Nb	3.33425	3.86287	1.62996	3.10194	3.56537	4.20424	1.68862	2.56301	2.56151	1.72229	2.45893	1.70808	1.47142	2.29769	0.909762	2.41736	2.27503	3.26642	2.00103	2.15213	1.99612	1.97075	1.61256	2.06171	0.67565	2.33079	2.15999	10.9725	3.08893	3.19527
La	0.0383447	0.0149977	0.0953509	0.00833333	0.043297	0.056153	0.0146479	0.00543948	0.0213173	0.02856	0.0290367	0.00833333	0.0302332	0.180156	0.00833333	0.00517536	0.0086045	0.00504391	0.00833333	0.249367	0.00333691	0.0304409	0.0653718	0.00833333	0.263232	0.0137834	0.0229348	0.0162121	0.363911	0.00359854
Ce	51.2908	10.8332	15.2705	29.9673	23.7855	25.7551	9.49787	15.1861	8.95021	13.665	7.46724	17.3812	8.21223	10.0586	8.74417	12.3536	13.9577	33.1102	19.7937	19.806	9.74508	6.90196	8.98239	21.1341	5.10975	12.3625	13.2786	23.2467	13.9748	11.3782
Pr	0.100583	0.0613051	0.0807675	0.0642629	0.0446163	0.224182	0.0299384	0.0808637	0.0298843	0.232254	0.0196658	0.0365038	0.0643291	0.100307	0.0081075	0.0275262	0.0500697	0.0887371	0.0327695	0.149487	0.0933908	0.0581704	0.0709442	0.0480309	0.302295	0.0619195	0.0546257	0.0548442	0.280034	0.0760587
Nd	2.54335	1.06553	1.09763	1.41477	0.623514	2.72145	0.589383	1.67338	0.461697	3.7791	0.57145	1.09135	1.00705	0.876314	0.195625	0.708665	0.633056	1.44962	0.512931	1.59583	1.4897	1.01256	1.78438	0.95689	3.17781	0.861606	0.823481	1.107	2.58957	1.55938
Sm	6.11395	2.46224	1.33541	3.23647	1.30808	6.05142	1.50692	3.28192	1.13313	7.17894	1.39906	1.99953	2.16978	1.42927	0.401461	1.97949	2.27272	3.4395	1.12038	2.94305	2.86188	2.32863	2.31893	1.97254	5.08035	1.65203	1.95128	2.85225	4.00536	3.00272
Eu	0.808202	0.119968	0.345503	0.584158	0.233362	0.762857	0.105641	0.740206	0.19201	1.01488	0.149142	0.445851	0.275467	0.240407	0.12612	0.409188	0.422256	0.705254	0.272519	0.728767	0.649917	0.35459	0.768393	0.459391	2.36338	0.31516	0.558379	0.26709	1.15651	0.715157
Gd	35.7602	16.8427	9.1155	17.7433	7.18648	30.2611	8.81434	21.2905	8.67618	36.6869	8.95901	12.1085	12.9269	7.89911	3.59504	13.2651	14.9696	19.2792	8.60857	16.4522	18.3664	14.1869	13.7032	13.027	24.4877	9.24515	10.8166	18.283	17.8928	17.2057
Tb	12.453	5.61726	3.17386	6.40236	2.74071	10.3508	3.11529	6.91859	3.11243	11.9573	3.25249	4.0787	4.77138	3.03984	1.36297	4.82251	5.28936	6.95531	3.20709	5.68155	6.45884	4.66496	4.88405	4.73522	10.7702	3.04306	4.08683	6.95435	5.99854	5.65195
Dy	154.471	66.0799	38.4224	75.7061	38.4922	126.647	40.5227	82.5865	39.4519	137.402	41.1956	49.5101	57.0285	36.6252	16.9765	60.5826	66.8014	84.1835	40.676	66.3588	74.4643	57.0483	56.7053	58.7532	113.498	37.2691	46.5443	90.2907	70.6975	70.1086
Ho	59.8468	25.495	15.342	29.509	16.5601	47.3269	16.3703	31.2551	15.8593	49.5999	15.9954	20.0084	21.881	14.2449	6.99563	23.0037	25.8278	32.5927	16.2864	25.7826	28.6216	21.4791	21.5351	23.7325	32.4814	14.9726	17.8653	35.1836	27.0785	27.7303
Er	272.085	113.742	73.3804	134.996	87.2751	216.582	80.5248	138.796	74.5642	215.134	74.6233	91.2225	96.5192	68.4703	36.1579	107.187	118.653	147.593	77.8936	114.956	128.565	93.2296	95.1227	107.392	112.771	73.854	83.2105	164.293	124.745	128.656
Tm	58.1841	22.4763	15.9961	28.4345	19.7052	43.4716	17.4213	28.4582	15.8819	41.8268	15.0315	19.6784	20.0189	14.914	8.23991	21.8498	23.8637	31.6795	16.8898	24.1483	26.1253	19.1289	19.4513	22.6086	19.5357	16.8269	17.263	34.1595	27.4659	27.0742
Yb	521.561	197.466	148.497	261.088	197.066	389.911	180.231	256.883	145.853	356.372	138.911	181.137	184.336	134.869	85.7996	202.196	214.767	288.531	164.179	220.096	231.302	172.347	179.085	207.446	163.472	182.569	167.782	306.922	271.487	254.717
Lu	104.175	39.8984	31.8327	53.1618	43.0501	78.061	41.9638	50.8942	30.1355	70.3592	28.0393	37.9562	37.0511	27.929	21.2646	41.4336	44.9555	57.5275	36.5893	45.5488	48.3518	34.4406	36.2303	42.264	34.8117	48.2407	34.5087	61.3368	57.6686	54.4598
Hf	9883.52	8388.57	8693.22	8363.63	9713.09	7228.76	9608.61	7956.19	8542.72	8098.05	8242.1	8668.5	8275.35	7297.56	8937.63	8091.07	8391.03	8311.55	9064.83	8137.33	7655.65	7894.09	7595.31	8136.26	9037.62	10321.9	8247.03	9365.71	8428.73	7596.74
Ta	2.08436	1.47827	0.638425	1.26883	1.50417	1.58477	1.04649	0.962577	0.85352	0.776684	0.89492	0.730839	0.619526	1.03632	0.31448	0.930402	1.05315	1.27533	0.86989	0.872662	0.687232	0.862075	0.633095	0.931818	0.260244	0.768927	0.654617	3.9694	0.836199	0.871449
Th	341.043	68.1035	70.1692	84.5031	68.9528	328.796	119.144	59.115	36.1523	154.114	35.4359	47.4797	73.8526	34.6823	65.7422	42.4193	55.6688	96.5014	67.816	49.9466	46.0866	36.3101	28.7569	48.7864	39.6882	122.207	49.0968	139.134	136.175	68.6687
U	294.744	136.83	244.964	81.2562	118.072	327.166	203.046	77.7284	79.9216	170.557	74.2754	68.248	155.781	59.9723	128.754	63.9377	90.3233	89.194	74.4191	53.0563	67.2392	65.7317	43.9512	51.6838	193.281	215.808	65.9696	314.63	362.896	143.091
U/Yb	0.565118	0.692933	1.64962	0.311222	0.599149	0.83908	1.12659	0.302582	0.547961	0.478592	0.534697	0.376777	0.845096	0.44467	1.50064	0.316217	0.420565	0.309131	0.453281	0.241059	0.290699	0.381392	0.245421	0.249144	1.18235	1.18206	0.393185	1.02512	1.3367	0.561763
Th/U	1.15708	0.497722	0.286448	1.03996	0.58399	1.00498	0.586785	0.760533	0.452347	0.903593	0.477088	0.695694	0.474078	0.578306	0.510602	0.663447	0.616328	1.08193	0.911271	0.94139	0.685413	0.552399	0.654291	0.943939	0.205339	0.566274	0.744234	0.442216	0.375246	0.479897
Y/Gd	51.3835	43.6967	51.4784	49.5716	73.8852	47.8581	55.2669	43.7737	53.958	40.5315	52.9052	48.2912	48.2684	55.3015	61.8168	51.3657	50.9353	50.1923	57.4107	45.4635	45.2857	43.2481	45.1765	52.3948	39.3654	53.2382	50.8054	59.4727	46.3025	48.4391
Yb/Gd	14.5849	11.7241	16.2906	14.7147	27.4218	12.8849	20.4475	12.0656	16.8107	9.71387	15.5052	14.9594	14.2598	17.074	23.8661	15.2427	14.3469	14.9659	19.0715	13.3779	12.5938	12.1483	13.0688	15.9243	6.67568	19.7475	15.5115	16.7872	15.173	14.8043
Tempereture (Ti)	716.13	707.085	746.846	773.417	709.765	766.915	647.38	697.584	726.892	737.772	699.475	753.752	646.459	715.348	660.788	736.132	712.875	774.363	725.02	768.853	739.634	704.982	783.942	767.745	697.347	663.688	761.28	727.438	711.641	701.795
Eu#	0.167124	0.0569605	0.302784	0.235699	0.232721	0.172366	0.0886281	0.270754	0.18724	0.191208	0.128804	0.277051	0.159036	0.218767	0.320989	0.244159	0.221349	0.264809	0.268305	0.320227	0.274094	0.188631	0.416781	0.277094	0.647877	0.246573	0.371624	0.113089	0.417704	0.30422
Ce#	198.78	85.9895	41.8814	311.679	130.253	55.2491	109.162	174.277	85.3483	40.383	75.2108	239.857	44.8193	18.0093	256.044	249.114	161.851	376.683	288.292	24.6902	132.865	39.4768	31.7459	254.252	4.35978	101.85	90.2931	187.64	10.5364	165.533
Gd/YbN	0.0553276	0.0688282	0.0495346	0.0548396	0.0294274	0.0626277	0.0394644	0.0668801	0.0480021	0.083072	0.0520439	0.0539427	0.0565891	0.047262	0.0338115	0.05294	0.0562457	0.0539192	0.0423117	0.0603194	0.0640754	0.0664248	0.0617463	0.050674	0.120879	0.0408633	0.0520226	0.0480693	0.0531834	0.0545079
